# Supplementary material for: AIE-active vitrimer with photoluminescence, reprocessability and shape memory effects
Source: Royal Society of Chemistry journal article supplement (doi:10.1039/d4qm00333k), 2024-01-01
Supplement: d4qm00333k1.pdf [file d4qm00333k1.pdf]

## Supplementary Information

### AIE-Active Vitriimer with Photoluminescence, Reprocessibility and Shape Memory Effect

Hongyao Niu, Zhou Deng, Fenfen Wang\*, Pingchuan Sun\*

Key Laboratory of Functional Polymer Materials of Ministry of Education and College of Chemistry,  
Nankai University, Tianjin 300071, China.

\*Corresponding author. Email: [spclbh@nankai.edu.cn](mailto:spclbh@nankai.edu.cn); [wff@nankai.edu.cn](mailto:wff@nankai.edu.cn)

#### Characterization of chemical structures

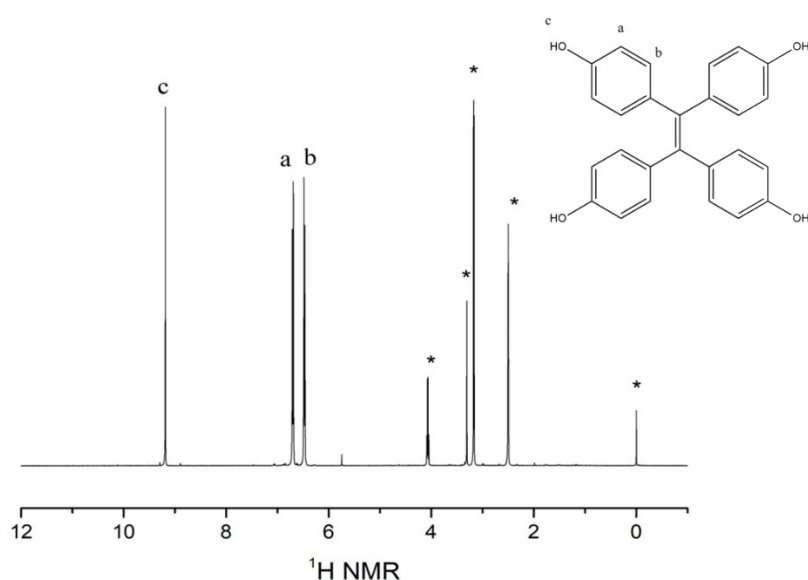

**Supplementary Figure S1** <sup>1</sup>H NMR spectra of tetra(4-hydroxyphenyl)ethylene ([DMSO-d<sub>6</sub>, 400 MHz]): δ=9.19 (4H, -OH), δ=6.69-6.71 (8H, Ar-H, a), δ=6.46-6.49 (8H, Ar-H, b)

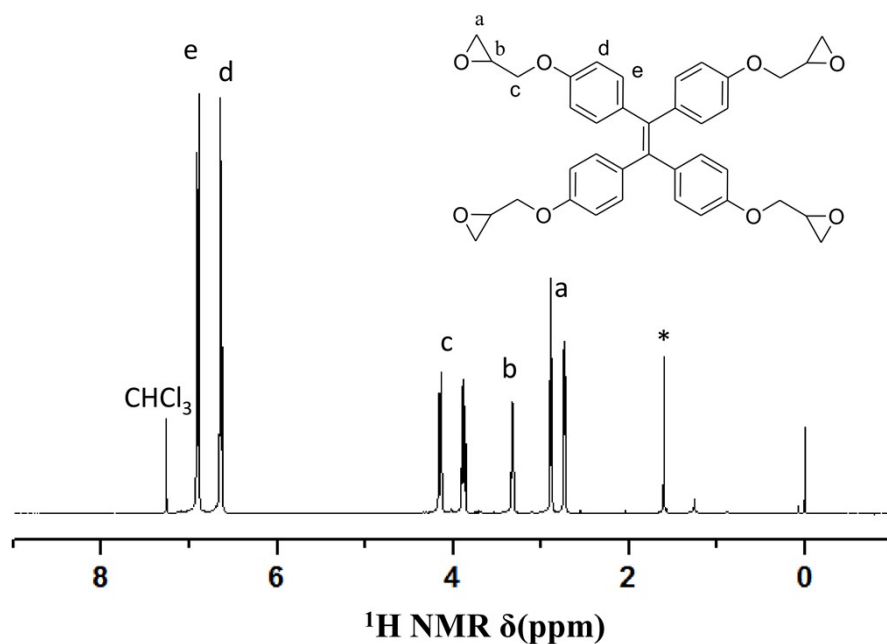

**Supplementary Figure S2**  $^1\text{H}$  NMR spectra of tetra(4-glycidyoxyphenyl) ethylene ( $[\text{CDCl}_3, 400 \text{ MHz}]$ ):  $\delta=6.98\text{-}6.96$  (8H, Ar-H),  $\delta=6.69\text{-}6.71$  (8H, Ar-H),  $\delta=4.21\text{-}4.11, 3.97\text{-}3.93$  (8H, -O-CH<sub>2</sub>),  $\delta=3.33\text{-}3.37$  (4H, -CH<sub>2</sub>-CH-CH<sub>2</sub>),  $\delta=2.90\text{-}2.95, 2.74\text{-}2.78$  (8H, -CH-CH<sub>2</sub>).

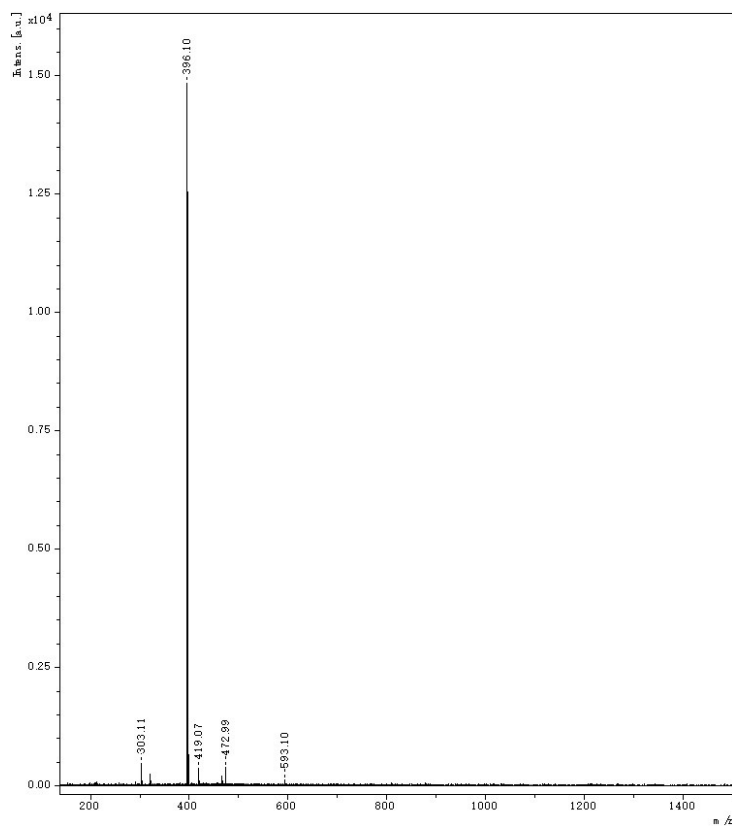

**Supplementary Figure S3** MALDI-TOF MS spectrum recorded for TPE-OH. The  $m/z$  calcd

for  $C_{26}H_{20}O_4^+$ : 396.14, found 396.10.

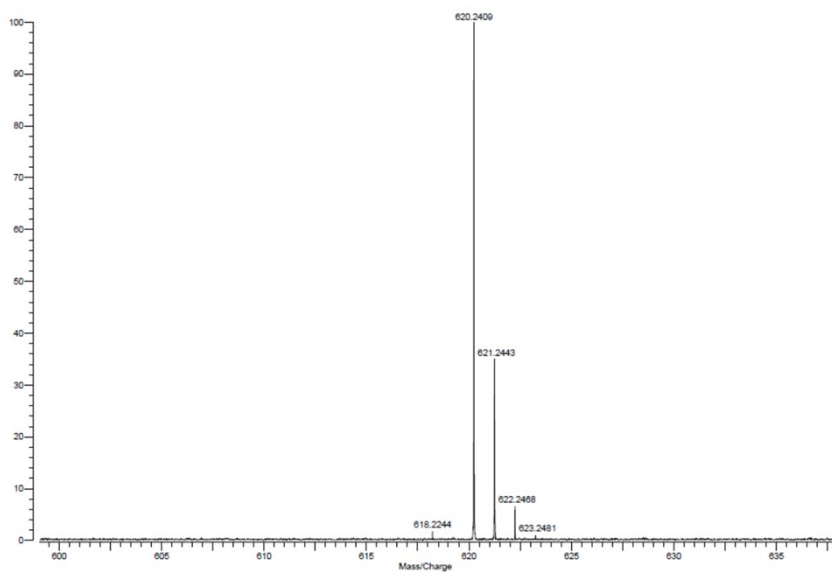

**Supplementary Figure S4** MS spectrum recorded for TPE-EPO. The m/z calcd for  $C_{26}H_{20}O_4^+$ : 620.2410, found 620.2409.

## Experimental results

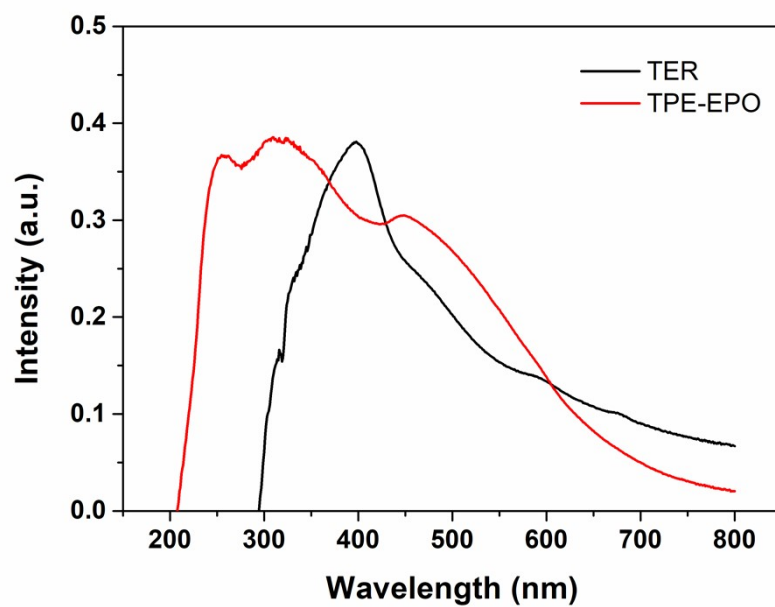

**Supplementary Figure S5** UV-vis spectra of TPE-EPO and TER.

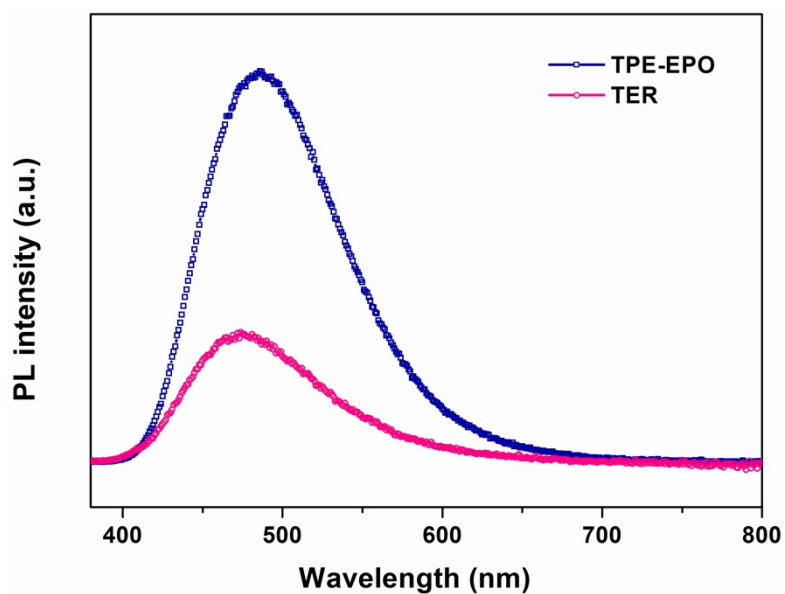

**Supplementary Figure S6** Fluorescence emission spectra of TPE-EPO and TPE with excitation light of 365nm.

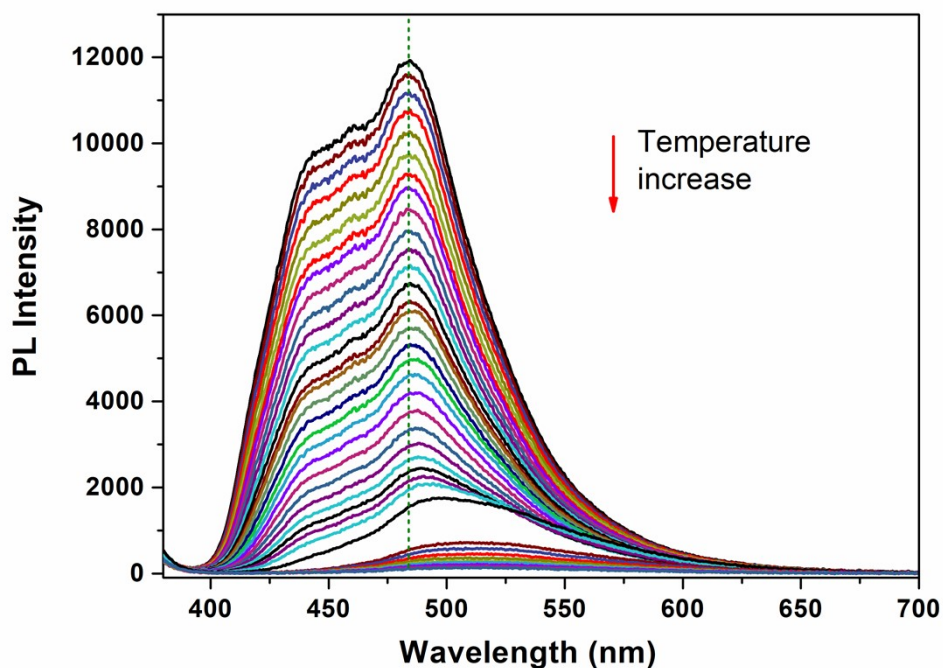

**Supplementary Figure S7** Fluorescence spectra of TPE-EPO at different temperature from 0 to 190 °C

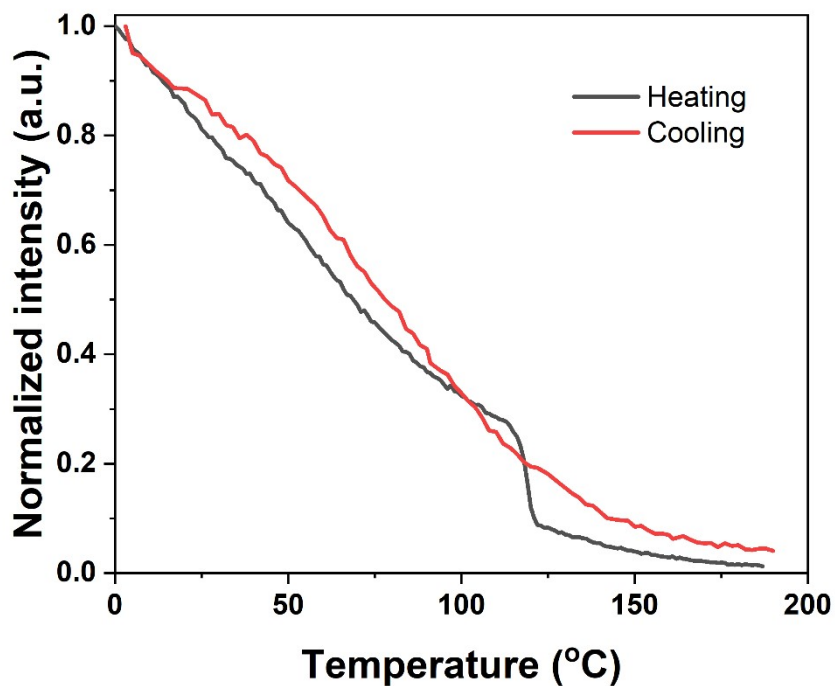

Supplementary Figure S8 Plot of normalized fluorescence intensities from 0°C - 190 °C in heating/cooling scan at the wavelength of 490 nm.

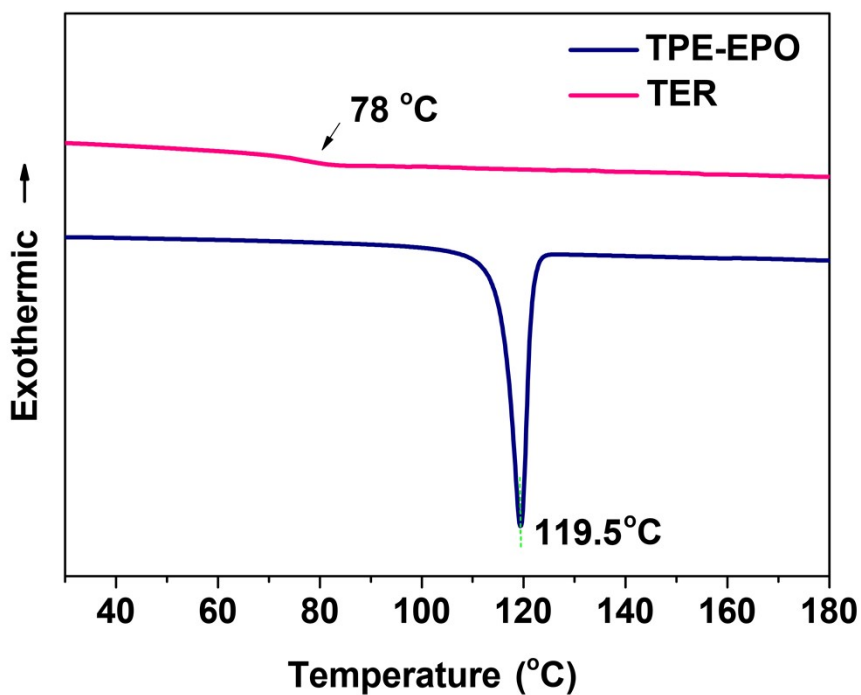

Supplementary Figure S9 DSC traces of TER and TPE-EPO upon heating scan (rate of 10 °C/min)

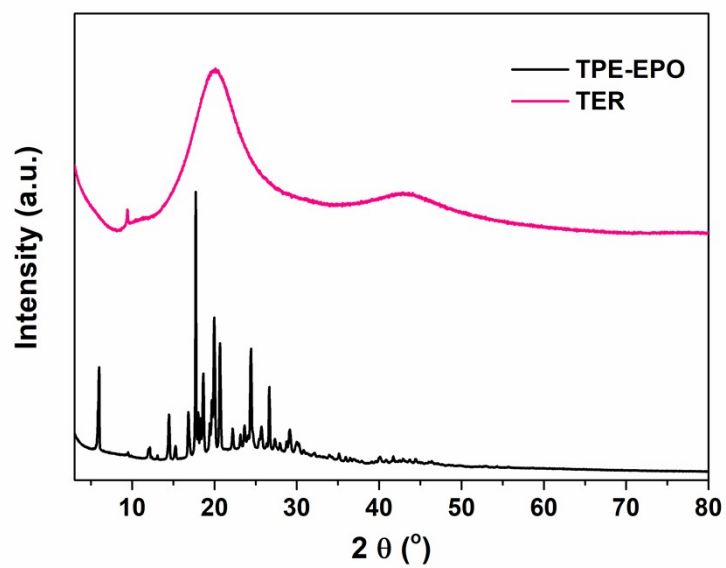

Supplementary Figure S10 XRD curves of TER vitrimer film and TPE-EPO powder.

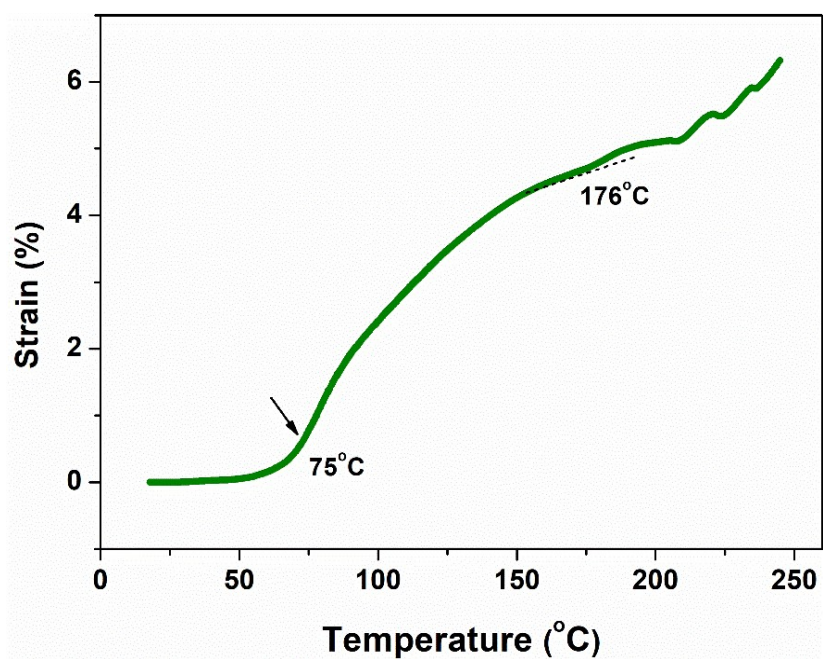

Supplementary Figure S11 Dilatometry experimental curve for TER with a heating rate of 5  $^\circ\text{C}/\text{min}$ .

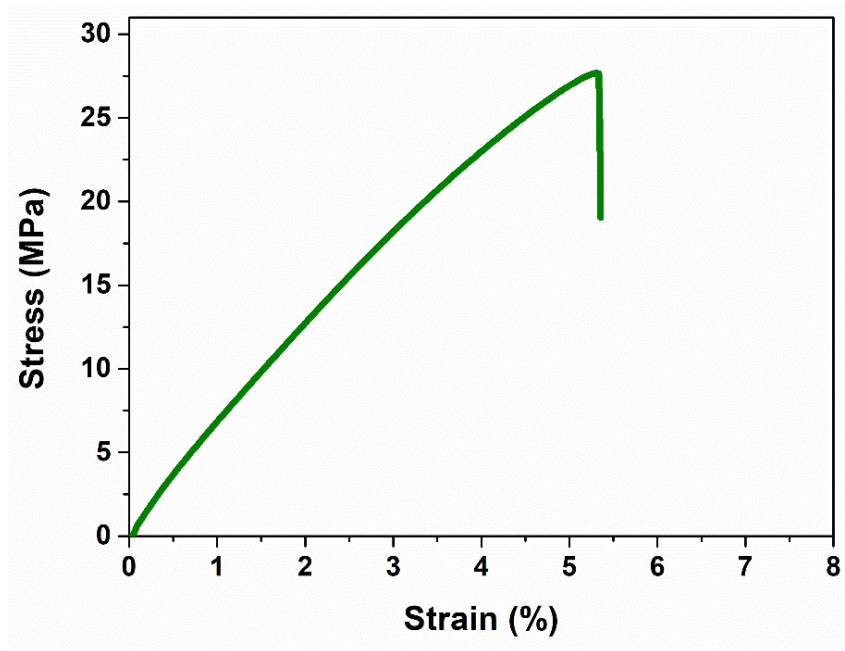

**Supplementary Figure 12** Stress-strain curve of the TER film at room temperature.
